# Supplementary material for: Sarcopenia and Appendicular Muscle Mass as Predictors of Impaired Fasting Glucose/Type 2 Diabetes in Elderly Women
Source: MDPI journal article supplement (doi:10.3390/nu13061909), 2021-06-02
Supplement: s1 [file s1]

## Supplementary materials

**Supplemental Table S1.** Dietary intake assessment of the cohort classified according to appendicular skeletal muscle mass.

|                                  | ASMM       |             | P <sup>a</sup> |
|----------------------------------|------------|-------------|----------------|
|                                  | Normal     | Low         |                |
| ASMM (range, kg)                 | 15 - 22.5  | 10.6 - 14.9 |                |
| Calorie intake (kcal)            | 1535 ± 459 | 1677 ± 440  | 0.11           |
| Carbohydrates <sup>b</sup> (%)   | 48.7 ± 8   | 46.4 ± 7    | 0.14           |
| Proteins <sup>b</sup> (%)        | 18.8 ± 3   | 17.6 ± 3    | 0.06           |
| Plant proteins <sup>b</sup> (%)  | 6.6 ± 1    | 6.1 ± 1     | 0.11           |
| Animal proteins <sup>b</sup> (%) | 12.1 ± 3   | 11.5 ± 4    | 0.39           |
| Fats <sup>b</sup> (%)            | 31.3 ± 7   | 34.2 ± 5    | 0.019          |
| Cholesterol (g)                  | 204 ± 59   | 210 ± 87    | 0.71           |
| Total fiber (g)                  | 19.4 ± 7   | 20.9 ± 7    | 0.26           |
| Alcohol (g)                      | 5.7 ± 10   | 6.1 ± 9     | 0.82           |

Data are mean ± SD. <sup>a</sup> Student's unpaired t-test. <sup>b</sup> Adjusted for 1000/kcal ASMM, appendicular skeletal muscle mass

**Supplemental Table S2.** Changes in anthropometric parameters and blood glucose at follow-up according to the diagnosis of IFG/T2D

|                          | Glucose tolerance   |                     | P <sup>a</sup> |
|--------------------------|---------------------|---------------------|----------------|
|                          | Normal<br>(n = 142) | IFG/T2D<br>(n = 17) |                |
| Age (years)              | 70 ± 5              | 72 ± 6              | 0.37           |
| Follow-up time (months)  | 41 ± 23             | 39 ± 26             | 0.71           |
| Weight (kg)              | -0.53 ± 4           | -0.73 ± 3           | 0.84           |
| BMI (kg/m <sup>2</sup> ) | -0.15 ± 2           | 0.29 ± 1            | 0.22           |
| BMI-defined obesity (%)  | 23                  | 27                  | 0.71           |
| Blood glucose (mg/dL)    | -1.4 ± 6            | 11.8 ± 9            | <0.001         |

Data are mean ± SD or prevalence as appropriate. <sup>a</sup> Student's paired t-test or Student's unpaired t-test.

BMI, body mass index; IFG, impaired fasting glucose; T2D, type 2 diabetes.

**Supplemental Table S3.** Clinical characteristics at follow-up and changes of these parameters at follow-up of the cohort classified according to appendicular skeletal muscle mass.

|                                 | ASMM      |             | p <sup>a</sup> |
|---------------------------------|-----------|-------------|----------------|
|                                 | Normal    | Low         |                |
| ASMM (range, kg)                | 15 - 22.5 | 10.6 - 14.9 |                |
| Follow-up time (months)         | 43 ± 22   | 38 ± 24     | 0.18           |
| Body weight (kg)                | 69.9 ± 11 | 57.5 ± 5    | 0.001          |
| Body weight change (kg)         | -1.3 ± 4  | 0.1 ± 3     | 0.06           |
| BMI (kg/m <sup>2</sup> )        | 29.8 ± 4  | 25.6 ± 2    | <0.001         |
| BMI change (kg/m <sup>2</sup> ) | -0.35 ± 2 | 0.13 ± 1    | 0.15           |
| Weight stability (%)            | 73        | 83          | 0.24           |
| Weight increase (>5%; %)        | 6         | 8           | 0.72           |
| BMI-defined obesity (%)         | 42        | 6           | <0.001         |
| Blood glucose (mg/dL)           | 89 ± 7    | 90 ± 8      | 0.41           |
| Blood glucose change (mg/dL)    | -0.95 ± 8 | 1.53 ± 8    | 0.14           |

Data are mean ± SD or prevalence as appropriate. <sup>a</sup>Student's paired t-test.

ASMM, appendicular skeletal muscle mass; BMI, body mass index.
